# Supplementary material for: Comparative genomics and transcriptomics of Escherichia coli isolates carrying virulence factors of both enteropathogenic and enterotoxigenic E. coli
Source: PubMed Central journal article supplement (PMC5471185; doi:10.1038/s41598-017-03489-z), 2017-06-14
Supplement: 41598_2017_3489_MOESM1_ESM.pdf [file 41598_2017_3489_MOESM1_ESM.pdf]

Comparative genomics and transcriptomics of *Escherichia coli* isolates carrying virulence factors of both enteropathogenic and enterotoxigenic *E. coli*

Tracy H. Hazen<sup>1,2</sup>, Jane Michalski<sup>1</sup>, Qingwei Luo<sup>3</sup>, Amol C. Shetty<sup>1</sup>, Sean C. Daugherty<sup>1</sup>, James M. Fleckenstein<sup>3,4</sup>, and David A. Rasko<sup>1,2\*</sup>

**Supplemental Tables**

**Table S1.** Strains analyzed in this study

**Table S2.** Select LS-BSR gene clusters

**Table S3.** RNA-Seq samples generated in this study

**Table S4.** Differential expression of EPEC7 and LT EPEC-specific gene clusters

**Supplemental Figures.**

**Figure S1.** Plasmid profile gel

**Figure S2.** *In silico* detection of *E. coli* virulence genes

**Figure S3.** Clustered heatmap of p666 compared to all the EPEC and ETEC

**Figure S4.** Clustered heatmap of p948 compared to all the EPEC and ETEC

**Figure S5.** FIB *repA* phylogeny

**Figure S6.** FIIA *repA* phylogeny

**Figure S7.** PCA plot and heatmap of all samples

**Figure S8.** ORF diagram, LS-BSR heatmap, and DE heatmap of BFP

**Figure S9.** Immunoblot analysis of YghJ and EatA

**Figure S10.** Alignments of *eltA*

**Supplemental DataSets**

**Data Set S1.** DE genes of E2348/69 (need to inform journal it is in 0.5 paper)

**Data Set S2.** DE genes of H10407

**Data Set S3.** DE genes of HS

**Data Set S4.** DE genes of 102651

**Data Set S5.** DE genes of 102712

**Data Set S6.** DE genes of 401140

**Data Set S7.** DE genes of 402290 (need to inform journal it is in 0.5 paper)

**Data Set S8.** LS-BSR values for all ETEC and EPEC in the phylogenomic analysis

**Data Set S9.** Fasta file of the nucleotide sequences of all LS-BSR gene clusters for all ETEC and EPEC in the phylogenomic analysis (need to add cluster ids to fasta headers)

**Data Set S10.** LS-BSR values for the ETEC and EPEC isolates analyzed using RNA-Seq

**Data Set S11.** Fasta file of the nucleotide sequences of all LS-BSR gene clusters for the ETEC and EPEC isolates analyzed using RNA-Seq (need to add cluster ids to fasta headers)

**Table S1.** Bacterial isolates analyzed in this study

| Isolate ID       | Pathovar | Phylogroup | AEEC                 |     |     |    |    |      |      | Accession No.  |
|------------------|----------|------------|----------------------|-----|-----|----|----|------|------|----------------|
|                  |          |            | Phylogenomic Lineage | LEE | BFP | LT | ST | EatA | T2SS |                |
| <u>EPEC/ETEC</u> |          |            |                      |     |     |    |    |      |      |                |
| 102651           | AEEC     | B1         | EPEC7                | +   | -   | +  | -  | -    | +    | MJIN00000000   |
| 102712           | AEEC     | B1         | EPEC7                | +   | -   | +  | -  | -    | +    | MJIO00000000   |
| 102771           | AEEC     | B1         | EPEC7                | +   | -   | +  | -  | -    | +    | MJIP00000000   |
| 401140           | EPEC     | A          | EPEC5                | +   | +   | -  | -  | +    | +    | JHRM00000000   |
| <u>EPEC</u>      |          |            |                      |     |     |    |    |      |      |                |
| E2348/69         | EPEC     | B2         | EPEC1                | +   | +   | -  | -  | -    | +    | NC_011601.1    |
| 2362-75          | EPEC     | B2         | EPEC1                | +   | +   | -  | -  | -    | +    | ADUL00000000   |
| B171             | EPEC     | B1         | EPEC2                | +   | +   | -  | -  | -    | -    | AAJX00000000.2 |
| 32/73            | EPEC     | B1         | EPEC2                | +   | +   | -  | -  | -    | -    | LAFa00000000   |
| C581-05          | EPEC     | B2         | EPEC4                | +   | +   | -  | -  | -    | +    | AIBE00000000   |
| 302150           | EPEC     | B2         | EPEC4                | +   | +   | -  | -  | -    | +    | JHSD00000000   |
| 103338           | EPEC     | A          | EPEC5                | +   | +   | -  | -  | -    | -    | JHSU00000000   |
| 402290           | EPEC     | B1         | EPEC7                | +   | +   | -  | -  | -    | +    | JHRQ00000000   |
| 401091           | EPEC     | B1         | EPEC7                | +   | +   | -  | -  | -    | +    | JHSI00000000   |
| 400791           | EPEC     | B1         | EPEC7                | +   | +   | -  | -  | -    | +    | JHRK00000000   |
| 401150           | EPEC     | B1         | EPEC7                | +   | +   | -  | -  | -    | +    | JHRN00000000   |
| 302687           | EPEC     | B1         | EPEC7                | +   | +   | -  | -  | -    | +    | JHSE00000000   |
| 302662           | EPEC     | B1         | EPEC7                | +   | +   | -  | -  | -    | +    | JHRI00000000   |
| 100343           | EPEC     | B1         | EPEC7                | +   | +   | -  | -  | -    | +    | JHQW00000000   |
| 103573           | EPEC     | B1         | EPEC7                | +   | +   | -  | -  | -    | +    | JHRA00000000   |
| 200146           | EPEC     | B1         | EPEC7                | +   | +   | -  | -  | -    | +    | JHRZ00000000   |
| 403341           | EPEC     | B1         | EPEC7                | +   | -   | -  | -  | -    | +    | JHTK00000000   |
| 303341           | EPEC     | B1         | EPEC7                | +   | -   | -  | -  | -    | +    | JHTD00000000   |
| 401588           | EPEC     | B2         | EPEC8                | +   | +   | -  | -  | -    | +    | JHsk00000000   |
| 300214           | EPEC     | B2         | EPEC8                | +   | +   | -  | -  | -    | +    | JHsB00000000   |
| 302053           | EPEC     | B2         | EPEC9                | +   | +   | -  | -  | -    | +    | JHRG00000000   |
| 303145           | EPEC     | B2         | EPEC9                | +   | +   | -  | -  | -    | +    | JHsG00000000   |
| 702324           | EPEC     | B2         | EPEC9                | +   | +   | -  | -  | -    | +    | JHRR00000000   |
| 100329           | EPEC     | A          | EPEC10               | +   | +   | -  | -  | -    | -    | JHRT00000000   |
| C260-92          | EPEC     | A          | EPEC10               | +   | +   | -  | -  | -    | -    | AIAO00000000   |
| E110019          | AEEC     | B1         | None                 | +   | -   | -  | -  | -    | +    | AAJW00000000.2 |
| <u>ETEC</u>      |          |            |                      |     |     |    |    |      |      |                |
| TW11681          | ETEC     | A          | None                 | -   | -   | -  | +  | +    | +    | AELD00000000   |
| H10407           | ETEC     | A          | None                 | -   | -   | +  | +  | +    | +    | FN649414.1     |
| TW10598          | ETEC     | A          | None                 | -   | -   | +  | +  | -    | +    | AELA00000000   |
| UMNK88           | ETEC     | A          | None                 | -   | -   | +  | -  | -    | +    | NC_017641.1    |
| 2846750          | ETEC     | A          | None                 | -   | -   | +  | +  | +    | +    | AQGG00000000   |
| MP021566.1       | ETEC     | A          | None                 | -   | -   | +  | +  | +    | +    | AQEU00000000   |
| BCE019_MS-13     | ETEC     | A          | None                 | -   | -   | +  | +  | +    | +    | AQCZ00000000   |
| B7A              | ETEC     | B1         | None                 | -   | -   | +  | +  | +    | +    | AAJT00000000.2 |
| TW14425          | ETEC     | B1         | None                 | -   | -   | -  | +  | -    | +    | AELE00000000   |
| E24377A          | ETEC     | B1         | None                 | -   | -   | +  | +  | +    | +    | NC_009801.1    |
| TW10828          | ETEC     | B1         | None                 | -   | -   | +  | -  | -    | +    | AELC00000000   |
| Jurua 18/11      | ETEC     | B1         | None                 | -   | -   | +  | -  | +    | +    | AQFB00000000   |
| ThroopD          | ETEC     | B1         | None                 | -   | -   | +  | +  | +    | +    | AQeJ00000000   |
| 2726800          | ETEC     | B1         | None                 | -   | -   | +  | +  | -    | +    | AQFE00000000   |
| 2854350          | ETEC     | B1         | None                 | -   | -   | +  | +  | -    | +    | APZL00000000   |
| BCE002_MS-12     | ETEC     | B1         | None                 | -   | -   | +  | -  | -    | +    | AQDA00000000   |
| Envira 8/11      | ETEC     | B1         | None                 | -   | -   | +  | +  | -    | +    | AQFC00000000   |

|                                          |               |    |                |   |   |   |                |   |   |                |
|------------------------------------------|---------------|----|----------------|---|---|---|----------------|---|---|----------------|
| 2866350                                  | ETEC          | B1 | None           | - | - | + | +              | + | + | APXJ00000000   |
| BCE034_MS-14                             | ETEC          | B1 | None           | - | - | - | +              | + | + | AQCY00000000   |
| 2851500                                  | ETEC          | B1 | None           | - | - | + | -              | + | + | AQDN00000000   |
| 2866450                                  | ETEC          | B1 | None           | - | - | + | -              | + | + | AQDI00000000   |
| 2845650                                  | ETEC          | E  | None           | - | - | - | <sup>b</sup> + | - | + | AQDR00000000   |
| TW10509                                  | ETEC          | F  | None           | - | - | + | <sup>b</sup> + | + | + | AEHW00000000   |
| <u>Whole-Genome Phylogeny References</u> |               |    |                |   |   |   |                |   |   |                |
| BL21                                     | lab adapted   | A  | None           | - | - | - | -              | - | - | NC_012947.1    |
| BW2952                                   | lab adapted   | A  | None           | - | - | - | -              | - | - | NC_012759.1    |
| SE11                                     | fecal isolate | B1 | None           | - | - | - | -              | - | + | NC_011415.1    |
| IA11                                     | fecal isolate | B1 | None           | - | - | - | -              | - | + | NC_011741.1    |
| SMS_3_5                                  | other         | F  | None           | - | - | - | -              | - | + | CP000970.1     |
| HS                                       | commensal     | A  | None           | - | - | - | -              | - | + | NC_009800.1    |
| ATCC 8739                                | lab adapted   | A  | None           | - | - | - | -              | - | - | NC_010468.1    |
| 536                                      | ExPEC         | B2 | None           | - | - | - | -              | - | + | NC_008253.1    |
| S88                                      | ExPEC         | B2 | None           | - | - | - | -              | - | + | NC_011742.1    |
| UTI89                                    | ExPEC         | B2 | None           | - | - | - | -              | - | + | NC_007946.1    |
| CFT073                                   | ExPEC         | B2 | None           | - | - | - | -              | - | - | AE014075.1     |
| IA139                                    | ExPEC         | F  | None           | - | - | - | -              | - | + | NC_011750.1    |
| UMN026                                   | ExPEC         | D  | None           | - | - | - | -              | - | + | NC_011751.1    |
| 042                                      | EAEC          | D  | None           | - | - | - | -              | - | + | FN554766.1     |
| 53638                                    | EIEC          | A  | None           | - | - | - | -              | - | + | AAKB00000000.2 |
| 55989                                    | EAEC          | B1 | None           | - | - | - | -              | - | + | NC_011748.1    |
| TY-2482                                  | EAEC/STEC     | B1 | None           | - | - | - | -              | - | + | AFOG00000000.1 |
| <i>S. flexneri</i> 2a 2457T              | Shigella      | B1 | None           | - | - | - | -              | - | - | NC_004741.1    |
| <i>S. boydii</i> 3083-94                 | Shigella      | B1 | None           | - | - | - | -              | - | + | NC_010658.1    |
| <i>S. sonnei</i> 046                     | Shigella      | B1 | None           | - | - | - | -              | - | - | NC_007384.1    |
| <i>S. dysenteriae</i> 197                | Shigella      | E  | None           | - | - | - | -              | - | + | NC_007606.1    |
| EDL933                                   | EHEC          | E  | O157 EHEC1     | + | - | - | -              | - | - | NC_002655.2    |
| Sakai                                    | EHEC          | E  | O157 EHEC1     | + | - | - | -              | - | - | NC_002695.1    |
| CB9615                                   | EPEC          | E  | O55 AEEC/EHEC1 | + | - | - | -              | - | + | NC_013941.1    |
| 11368                                    | EHEC          | B1 | non-O157 EHEC2 | + | - | - | -              | - | - | NC_013361.1    |
| 11128                                    | EHEC          | B1 | non-O157 EHEC2 | + | - | - | -              | - | + | NC_013364.1    |

<sup>a</sup>The virulence factor content was determined by *in silico* analysis of the genome assemblies.

<sup>b</sup>A divergent sequence was identified in the genome assembly.

**Table S2.** Predicted protein functions of select LS-BSR gene clusters

| LS-BSR Cluster ID                                                                                                                           | Gene ID     | Predicted Protein Function                                                  |
|---------------------------------------------------------------------------------------------------------------------------------------------|-------------|-----------------------------------------------------------------------------|
| <u>In ALL EPEC (LS-BSR <math>\geq 0.8</math>) and absent (LS-BSR <math>&lt; 0.4</math>) from ALL ETEC:</u>                                  |             |                                                                             |
| Cluster_340                                                                                                                                 |             | conserved hypothetical protein                                              |
| Cluster_915                                                                                                                                 |             | type III secretion apparatus H <sup>+</sup> -transporting two-sector ATPase |
| Cluster_3583                                                                                                                                |             | type III secretion system regulator family protein                          |
| Cluster_4568                                                                                                                                |             | type III secretion apparatus protein, YscI/HrpB, C-terminal domain          |
| <u>In ALL ETEC (LS-BSR <math>\geq 0.8</math>) and absent (LS-BSR <math>&lt; 0.4</math>) from ALL EPEC:</u>                                  |             |                                                                             |
| None                                                                                                                                        |             |                                                                             |
| <u>In ALL EPEC7 (LS-BSR <math>\geq 0.8</math>) and absent from ALL other <i>E. coli</i> (LS-BSR <math>&lt; 0.4</math>):</u>                 |             |                                                                             |
| Cluster_775                                                                                                                                 |             | conserved hypothetical protein                                              |
| <u>In ALL LT+ EPEC7 (LS-BSR <math>\geq 0.8</math>) and absent from ALL other <i>E. coli</i> (LS-BSR <math>&lt; 0.4</math>):</u>             |             |                                                                             |
| Cluster_502                                                                                                                                 |             | conserved hypothetical protein                                              |
| Cluster_503                                                                                                                                 |             | conserved hypothetical protein                                              |
| Cluster_504                                                                                                                                 |             | putative transcriptional regulator                                          |
| Cluster_505                                                                                                                                 |             | AAA domain protein                                                          |
| Cluster_506                                                                                                                                 | <i>hsdM</i> | type I restriction-modification system, M subunit                           |
| Cluster_625                                                                                                                                 |             | fimbrial family protein                                                     |
| Cluster_626                                                                                                                                 |             | hypothetical protein                                                        |
| Cluster_627                                                                                                                                 |             | helix-turn-helix domain protein                                             |
| Cluster_629                                                                                                                                 |             | hypothetical protein                                                        |
| Cluster_630                                                                                                                                 | <i>tnpA</i> | transposase for transposon domain protein                                   |
| Cluster_728                                                                                                                                 |             | putative prophage protein                                                   |
| Cluster_782                                                                                                                                 |             | chi7122                                                                     |
| Cluster_790                                                                                                                                 |             | cro/C1-type HTH DNA-binding domain protein                                  |
| Cluster_791                                                                                                                                 |             | phage integrase family protein                                              |
| Cluster_870                                                                                                                                 |             | TIR domain protein                                                          |
| Cluster_871                                                                                                                                 |             | conserved hypothetical protein                                              |
| Cluster_872                                                                                                                                 |             | RecF/RecN/SMC N terminal domain protein                                     |
| Cluster_950                                                                                                                                 |             | hypothetical protein                                                        |
| Cluster_951                                                                                                                                 | <i>papK</i> | fimbrial adapter PapK                                                       |
| Cluster_952                                                                                                                                 |             | helix-turn-helix domain protein                                             |
| Cluster_1048                                                                                                                                |             | conserved hypothetical protein                                              |
| Cluster_1049                                                                                                                                | <i>hsdR</i> | type I site-specific deoxyribonuclease, HsdR family protein                 |
| Cluster_1050                                                                                                                                |             | type I restriction modification DNA specificity domain protein              |
| Cluster_1219                                                                                                                                |             | putative protein PapJ                                                       |
| Cluster_1252                                                                                                                                |             | conserved hypothetical protein                                              |
| Cluster_1255                                                                                                                                | <i>lsoA</i> | mRNA endoribonuclease LsoA                                                  |
| Cluster_1279                                                                                                                                |             | conserved hypothetical protein                                              |
| <u>In <math>\geq 1</math> EPEC7 (LS-BSR <math>\geq 0.8</math>) and absent from all other <i>E. coli</i> (LS-BSR <math>&lt; 0.4</math>):</u> |             |                                                                             |
| Cluster_775                                                                                                                                 |             | conserved hypothetical protein                                              |
| Cluster_3281                                                                                                                                |             | hypothetical protein                                                        |
| Cluster_5817                                                                                                                                |             | hypothetical protein                                                        |
| Cluster_326                                                                                                                                 |             | ecoEI R C-terminal family protein                                           |
| Cluster_327                                                                                                                                 |             | methyltransferase small domain protein                                      |
| Cluster_1162                                                                                                                                |             | conserved hypothetical protein                                              |
| Cluster_1163                                                                                                                                |             | luxR family transcriptional regulator                                       |
| Cluster_1619                                                                                                                                |             | type I restriction modification DNA specificity domain protein              |
| Cluster_3159                                                                                                                                |             | conserved hypothetical protein                                              |
| Cluster_3160                                                                                                                                |             | AAA domain protein                                                          |

|              |             |                                                                       |
|--------------|-------------|-----------------------------------------------------------------------|
| Cluster_3644 |             | conserved hypothetical protein                                        |
| Cluster_3889 | <i>higA</i> | addiction module antidote protein, HigA family                        |
| Cluster_375  |             | glycosyl transferase family 2 domain protein                          |
| Cluster_5017 |             | T5orf172 domain protein                                               |
| Cluster_943  |             | putative membrane protein                                             |
| Cluster_945  |             | 3-beta hydroxysteroid dehydrogenase/isomerase family protein          |
| Cluster_1225 |             | glycosyl transferase 2 family protein                                 |
| Cluster_2044 |             | bacterial transferase hexapeptide family protein                      |
| Cluster_3925 |             | glycosyl transferases group 1 family protein                          |
| Cluster_3926 |             | polysaccharide biosynthesis family protein                            |
| Cluster_5747 |             | bacterial transferase hexapeptide family protein                      |
| Cluster_3217 |             | conserved hypothetical protein                                        |
| Cluster_3218 |             | conserved hypothetical protein                                        |
| Cluster_3236 |             | conserved hypothetical protein                                        |
| Cluster_3275 |             | conserved hypothetical protein                                        |
| Cluster_3276 |             | conserved hypothetical protein                                        |
| Cluster_3440 |             | conserved hypothetical protein                                        |
| Cluster_3515 |             | conserved hypothetical protein                                        |
| Cluster_3664 |             | conserved hypothetical protein                                        |
| Cluster_4223 |             | conserved hypothetical protein                                        |
| Cluster_5319 |             | conserved hypothetical protein                                        |
| Cluster_436  |             | acetyltransferase domain protein                                      |
| Cluster_4222 |             | putative phage superinfection exclusion Cor like protein              |
| Cluster_4825 |             | type I restriction modification DNA specificity domain protein        |
| Cluster_4916 |             | conserved hypothetical protein                                        |
| Cluster_3489 |             | hypothetical protein                                                  |
| Cluster_5295 |             | AAA domain protein                                                    |
| Cluster_5506 |             | hypothetical protein                                                  |
| Cluster_5294 |             | subtilase family protein                                              |
| Cluster_502  |             | conserved hypothetical protein                                        |
| Cluster_503  |             | conserved hypothetical protein                                        |
| Cluster_504  |             | putative transcriptional regulator                                    |
| Cluster_505  |             | AAA domain protein                                                    |
| Cluster_506  | <i>hsdM</i> | type I restriction-modification system, M subunit                     |
| Cluster_625  |             | fimbrial family protein                                               |
| Cluster_626  |             | hypothetical protein                                                  |
| Cluster_627  |             | helix-turn-helix domain protein                                       |
| Cluster_629  |             | hypothetical protein                                                  |
| Cluster_630  | <i>tnpA</i> | transposase for transposon domain protein                             |
| Cluster_728  |             | putative prophage protein                                             |
| Cluster_782  |             | putative escherichia coli chi7122 chi7122 genomic chromosome, chi7122 |
| Cluster_790  |             | cro/C1-type HTH DNA-binding domain protein                            |
| Cluster_791  |             | phage integrase family protein                                        |
| Cluster_870  |             | TIR domain protein                                                    |
| Cluster_871  |             | conserved hypothetical protein                                        |
| Cluster_872  |             | recF/RecN/SMC N terminal domain protein                               |
| Cluster_950  |             | hypothetical protein                                                  |
| Cluster_951  | <i>papK</i> | fimbrial adapter PapK                                                 |
| Cluster_952  |             | helix-turn-helix domain protein                                       |
| Cluster_1048 |             | conserved hypothetical protein                                        |
| Cluster_1049 | <i>hsdR</i> | type I site-specific deoxyribonuclease, HsdR family protein           |
| Cluster_1050 |             | type I restriction modification DNA specificity domain protein        |
| Cluster_1219 |             | putative protein PapJ                                                 |
| Cluster_1252 |             | conserved hypothetical protein                                        |

|              |             |                                                                       |
|--------------|-------------|-----------------------------------------------------------------------|
| Cluster_1255 | <i>IsoA</i> | mRNA endoribonuclease LsoA                                            |
| Cluster_1279 |             | conserved hypothetical protein                                        |
| Cluster_435  |             | polysaccharide biosynthesis family protein                            |
| Cluster_3219 |             | conserved hypothetical protein                                        |
| Cluster_3993 |             | conserved hypothetical protein                                        |
| Cluster_5505 |             | glycosyl transferases group 1 family protein                          |
| Cluster_711  |             | phosphatase 2C family protein                                         |
| Cluster_1257 |             | kinase domain protein                                                 |
| Cluster_1258 |             | kinase domain protein                                                 |
| Cluster_964  |             | pentapeptide repeats family protein                                   |
| Cluster_971  |             | conserved hypothetical protein                                        |
| Cluster_1951 |             | GDSL-like Lipase/Acylhydrolase family protein                         |
| Cluster_2016 |             | tail spike domain protein                                             |
| Cluster_5690 |             | hypothetical protein                                                  |
| Cluster_221  |             | lacY proton/sugar symporter family protein                            |
| Cluster_222  |             | SAF domain protein                                                    |
| Cluster_460  |             | helix-turn-helix domain protein                                       |
| Cluster_1643 |             | pyridoxal phosphate biosynthetic PdxA family protein                  |
| Cluster_1645 |             | bacterial transcriptional regulator family protein                    |
| Cluster_1710 |             | NYN domain protein                                                    |
| Cluster_1721 |             | chain length determinant family protein                               |
| Cluster_3620 |             | putative escherichia coli chi7122 chi7122 genomic chromosome, chi7122 |
| Cluster_3376 |             | putative membrane protein                                             |
| Cluster_879  |             | conserved hypothetical protein                                        |
| Cluster_900  |             | putative domain protein                                               |
| Cluster_901  |             | P63C domain protein                                                   |
| Cluster_902  |             | conserved hypothetical protein                                        |
| Cluster_973  |             | transposase, IS605 OrfB family                                        |
| Cluster_975  |             | hypothetical protein                                                  |
| Cluster_718  |             | initiator Replication family protein                                  |
| Cluster_1784 |             | hypothetical protein                                                  |
| Cluster_1836 |             | conserved hypothetical protein                                        |
| Cluster_1851 |             | hypothetical protein                                                  |
| Cluster_1852 |             | hypothetical protein                                                  |
| Cluster_1853 |             | conserved hypothetical protein                                        |
| Cluster_1854 |             | putative membrane protein                                             |
| Cluster_1855 |             | hypothetical protein                                                  |
| Cluster_1856 |             | conserved hypothetical protein                                        |
| Cluster_1857 |             | hypothetical protein                                                  |
| Cluster_1858 |             | hypothetical protein                                                  |
| Cluster_1860 |             | conserved hypothetical protein                                        |
| Cluster_1865 |             | conserved hypothetical protein                                        |
| Cluster_1867 |             | HNH endonuclease family protein                                       |
| Cluster_1868 |             | putative antitermination protein N                                    |
| Cluster_1871 |             | conserved hypothetical protein                                        |
| Cluster_1872 |             | dnaB-like helicase N terminal domain protein                          |
| Cluster_1873 |             | conserved hypothetical protein                                        |
| Cluster_1874 |             | hypothetical protein                                                  |
| Cluster_1875 |             | putative membrane protein                                             |
| Cluster_1876 |             | conserved hypothetical protein                                        |
| Cluster_1878 |             | conserved hypothetical protein                                        |
| Cluster_1879 |             | conserved hypothetical protein                                        |
| Cluster_1882 |             | putative gp68                                                         |
| Cluster_1885 |             | putative protein ninY                                                 |

|              |             |                                                             |
|--------------|-------------|-------------------------------------------------------------|
| Cluster_1886 |             | conserved hypothetical protein                              |
| Cluster_1887 |             | hypothetical protein                                        |
| Cluster_1888 |             | conserved hypothetical protein                              |
| Cluster_1889 | 19          | lysozyme                                                    |
| Cluster_1891 |             | head fiber family protein                                   |
| Cluster_1892 |             | hypothetical protein                                        |
| Cluster_1893 |             | hypothetical protein                                        |
| Cluster_1895 |             | terminase-like family protein                               |
| Cluster_1896 |             | conserved hypothetical protein                              |
| Cluster_1897 |             | phage head morphogenesis , SPP1 gp7 family domain protein   |
| Cluster_1898 |             | ADP-ribosyltransferase exoenzyme family protein             |
| Cluster_1899 |             | conserved hypothetical protein                              |
| Cluster_1901 |             | putative gp12                                               |
| Cluster_1902 |             | conserved hypothetical protein                              |
| Cluster_1903 |             | conserved hypothetical protein                              |
| Cluster_1904 |             | putative gp07                                               |
| Cluster_1905 |             | conserved hypothetical protein                              |
| Cluster_1906 |             | conserved hypothetical protein                              |
| Cluster_1907 |             | conserved hypothetical protein                              |
| Cluster_1908 |             | conserved hypothetical protein                              |
| Cluster_1909 |             | conserved hypothetical protein                              |
| Cluster_1910 |             | conserved hypothetical protein                              |
| Cluster_1911 |             | conserved hypothetical protein                              |
| Cluster_1912 |             | conserved hypothetical protein                              |
| Cluster_1913 |             | conserved hypothetical protein                              |
| Cluster_1914 |             | putative phage P2 baseplate assembly protein gpV            |
| Cluster_1915 |             | hypothetical protein                                        |
| Cluster_1916 |             | conserved hypothetical protein                              |
| Cluster_1917 |             | putative bacteriophage protein                              |
| Cluster_1918 |             | conserved hypothetical protein                              |
| Cluster_1919 |             | phage Tail Collar domain protein                            |
| Cluster_1920 |             | pectate lyase superfamily protein                           |
| Cluster_1921 |             | acyltransferase family protein                              |
| Cluster_1966 |             | conserved hypothetical protein                              |
| Cluster_1967 |             | reverse transcriptase family protein                        |
| Cluster_1988 |             | calcineurin-like phosphoesterase superfamily domain protein |
| Cluster_1990 |             | HAD hydrolase, IA, variant 1 family protein                 |
| Cluster_2008 |             | conserved hypothetical protein                              |
| Cluster_2021 |             | yjzC-like family protein                                    |
| Cluster_2022 |             | conserved hypothetical protein                              |
| Cluster_2048 |             | hypothetical protein                                        |
| Cluster_2051 |             | putative phage protein                                      |
| Cluster_2077 | <i>toxN</i> | <i>toxN</i>                                                 |
| Cluster_2080 |             | conserved hypothetical protein                              |
| Cluster_3377 |             | glycosyl transferase 2 family protein                       |
| Cluster_3911 |             | conserved hypothetical protein                              |
| Cluster_3918 | <i>dcm</i>  | DNA (cytosine-5-)-methyltransferase family protein          |
| Cluster_3919 |             | HNH endonuclease family protein                             |
| Cluster_3938 |             | winged helix-turn-helix DNA-binding family protein          |
| Cluster_3939 |             | conserved hypothetical protein                              |
| Cluster_3942 |             | helix-turn-helix domain protein                             |
| Cluster_3943 |             | conserved hypothetical protein                              |
| Cluster_3945 |             | phage integrase family protein                              |
| Cluster_3968 |             | conserved hypothetical protein                              |

|              |                                 |
|--------------|---------------------------------|
| Cluster_3969 | helix-turn-helix family protein |
| Cluster_3970 | BRCA1 C Terminus domain protein |
| Cluster_3971 | conserved hypothetical protein  |
| Cluster_3976 | conserved hypothetical protein  |
| Cluster_3977 | conserved hypothetical protein  |
| Cluster_3978 | conserved hypothetical protein  |
| Cluster_3979 | conserved hypothetical protein  |
| Cluster_3982 | AAA domain protein              |
| Cluster_4023 | conserved hypothetical protein  |
| Cluster_4024 | conserved hypothetical protein  |
| Cluster_5645 | putative membrane protein       |
| Cluster_5646 | conserved hypothetical protein  |
| Cluster_5649 | RES domain protein              |
| Cluster_5683 | conserved hypothetical protein  |
| Cluster_5727 | conserved hypothetical protein  |
| Cluster_5768 | conserved hypothetical protein  |
| Cluster_5769 | conserved hypothetical protein  |
| Cluster_5793 | conserved hypothetical protein  |

In ≥1 LT+ EPEC7 (LS-BSR ≥0.8) and absent from all other *E. coli* (LS-BSR <0.4):

|              |                                                                         |
|--------------|-------------------------------------------------------------------------|
| Cluster_502  | conserved hypothetical protein                                          |
| Cluster_503  | conserved hypothetical protein                                          |
| Cluster_504  | putative transcriptional regulator                                      |
| Cluster_505  | AAA domain protein                                                      |
| Cluster_506  | <i>hsdM</i> type I restriction-modification system, M subunit           |
| Cluster_625  | fimbrial family protein                                                 |
| Cluster_626  | hypothetical protein                                                    |
| Cluster_627  | helix-turn-helix domain protein                                         |
| Cluster_629  | hypothetical protein                                                    |
| Cluster_630  | <i>tnpA</i> transposase for transposon domain protein                   |
| Cluster_728  | putative prophage protein                                               |
| Cluster_782  | putative escherichia coli chi7122 chi7122 genomic chromosome, chi7122   |
| Cluster_790  | cro/C1-type HTH DNA-binding domain protein                              |
| Cluster_791  | phage integrase family protein                                          |
| Cluster_870  | TIR domain protein                                                      |
| Cluster_871  | conserved hypothetical protein                                          |
| Cluster_872  | recF/RecN/SMC N terminal domain protein                                 |
| Cluster_950  | hypothetical protein                                                    |
| Cluster_951  | <i>papK</i> fimbrial adapter PapK                                       |
| Cluster_952  | helix-turn-helix domain protein                                         |
| Cluster_1048 | conserved hypothetical protein                                          |
| Cluster_1049 | <i>hsdR</i> type I site-specific deoxyribonuclease, HsdR family protein |
| Cluster_1050 | type I restriction modification DNA specificity domain protein          |
| Cluster_1219 | putative protein PapJ                                                   |
| Cluster_1252 | conserved hypothetical protein                                          |
| Cluster_1255 | <i>lsoA</i> mRNA endoribonuclease LsoA                                  |
| Cluster_1279 | conserved hypothetical protein                                          |

---



**Table S3.** RNA-Seq samples generated in this study

| Isolate ID | EPEC<br>Phylogenomic<br>Lineage | Phylogroup | Condition <sup>a</sup> | Replicate | Total Reads | Total Reads<br>Mapped | Percent<br>Mapped <sup>b</sup> | SRA Accession<br>No. |
|------------|---------------------------------|------------|------------------------|-----------|-------------|-----------------------|--------------------------------|----------------------|
| E2348/69   | EPEC1                           | B2         | LB                     | 1         | 39,347,430  | 25,579,676            | 65                             | SRX1322473           |
|            |                                 |            |                        | 2         | 43,218,880  | 28,221,680            | 65                             | SRX1322474           |
|            |                                 |            | LB + bile              | 1         | 51,473,692  | 32,950,310            | 64                             | SRS565935            |
|            |                                 |            |                        | 2         | 57,686,090  | 37,569,744            | 65                             | SRS565936            |
|            |                                 |            | DMEM                   | 1         | 90,223,668  | 64,341,630            | 71                             | SRX1322475           |
|            |                                 |            |                        | 2         | 78,280,450  | 52,692,826            | 67                             | SRX1322476           |
|            |                                 |            | DMEM + bile            | 1         | 71,198,438  | 49,864,236            | 70                             | SRS565937            |
|            |                                 |            |                        | 2         | 57,610,776  | 41,621,440            | 72                             | SRS565938            |
| HS         | None                            |            | LB                     | 1         | 50,772,302  | 32,849,202            | 65                             | SRS565948            |
|            |                                 |            |                        | 2         | 52,003,340  | 34,836,598            | 67                             | SRS565951            |
|            |                                 |            | LB + bile              | 1         | 72,007,402  | 51,786,686            | 72                             | SRS565952            |
|            |                                 |            |                        | 2         | 72,525,694  | 53,865,902            | 74                             | SRS565953            |
|            |                                 |            | DMEM                   | 1         | 70,158,216  | 52,992,778            | 76                             | SRS565955            |
|            |                                 |            |                        | 2         | 74,962,624  | 57,051,936            | 76                             | SRS565957            |
|            |                                 |            | DMEM + bile            | 1         | 51,096,500  | 38,117,776            | 75                             | SRS565963            |
|            |                                 |            |                        | 2         | 62,420,980  | 48,568,226            | 78                             | SRS565969            |
| H10407     | None                            |            | LB                     | 1         | 55,498,566  | 41,800,354            | 75                             | SRS565970            |
|            |                                 |            |                        | 2         | 51,293,386  | 38,520,998            | 75                             | SRS565976            |
|            |                                 |            | LB + bile              | 1         | 54,799,240  | 38,616,902            | 70                             | SRS565977            |
|            |                                 |            |                        | 2         | 43,799,822  | 33,340,362            | 76                             | SRS565978            |
|            |                                 |            | DMEM                   | 1         | 57,101,468  | 40,088,102            | 70                             | SRS565987            |
|            |                                 |            |                        | 2         | 62,931,300  | 47,969,092            | 76                             | SRS565988            |
|            |                                 |            | DMEM + bile            | 1         | 59,527,736  | 42,342,120            | 71                             | SRS565989            |
|            |                                 |            |                        | 2         | 50,365,876  | 36,116,252            | 72                             | SRS566197            |
| 102651     | EPEC7                           | B1         | LB                     | 1         | 73,197,712  | 49,007,590            | 67                             | SRS566236            |
|            |                                 |            |                        | 2         | 123,721,484 | 77,226,176            | 62                             | SRS566243            |
|            |                                 |            | LB + bile              | 1         | 49,602,068  | 31,402,332            | 63                             | SRS566244            |
|            |                                 |            |                        | 2         | 49,157,028  | 32,081,032            | 65                             | SRS566245            |
|            |                                 |            | DMEM                   | 1         | 27,718,212  | 18,463,578            | 67                             | SRS566265            |
|            |                                 |            |                        | 2         | 60,404,908  | 38,038,916            | 63                             | SRS566266            |
|            |                                 |            | DMEM + bile            | 1         | 59,221,444  | 38,784,580            | 65                             | SRS566268            |
|            |                                 |            |                        | 2         | 58,898,112  | 37,441,562            | 64                             | SRS566269            |
| 102712     | EPEC7                           | B1         | LB                     | 1         | 57,547,868  | 36,303,546            | 63                             | SRS566161            |
|            |                                 |            |                        | 2         | 62,863,746  | 40,050,722            | 64                             | SRS566162            |
|            |                                 |            | LB + bile              | 1         | 52,634,250  | 33,158,750            | 63                             | SRS566163            |
|            |                                 |            |                        | 2         | 53,977,308  | 32,797,362            | 61                             | SRS566164            |
|            |                                 |            | DMEM                   | 1         | 59,134,598  | 39,267,560            | 66                             | SRS566160            |
|            |                                 |            |                        | 2         | 58,687,496  | 37,143,184            | 63                             | SRS566213            |
|            |                                 |            | DMEM + bile            | 1         | 65,860,546  | 43,115,718            | 65                             | SRS566228            |
|            |                                 |            |                        | 2         | 61,210,084  | 40,836,850            | 67                             | SRS566235            |
| 401140     | EPEC5                           | A          | LB                     | 1         | 98,122,142  | 62,935,928            | 64                             | SRS566270            |
|            |                                 |            |                        | 2         | 109,658,950 | 68,745,070            | 63                             | SRS566276            |
|            |                                 |            | LB + bile              | 1         | 58,269,720  | 39,640,346            | 68                             | SRS567938            |
|            |                                 |            |                        | 2         | 64,479,582  | 44,791,154            | 69                             | SRS567940            |
|            |                                 |            | DMEM                   | 1         | 143,164,326 | 93,428,500            | 65                             | SRS566296            |
|            |                                 |            |                        | 2         | 68,560,186  | 43,607,642            | 64                             | SRS566297            |
|            |                                 |            | DMEM + bile            | 1         | 54,837,480  | 38,290,214            | 70                             | SRS567927            |
|            |                                 |            |                        | 2         | 64,669,908  | 43,779,508            | 68                             | SRS567937            |
| 402290     | EPEC7                           | B1         | LB                     | 1         | 41,672,396  | 25,888,056            | 62                             | SRX481833            |
|            |                                 |            |                        | 2         | 38,086,026  | 23,856,680            | 63                             | SRX481834            |
|            |                                 |            | DMEM                   | 1         | 43,796,848  | 27,200,176            | 62                             | SRX481835            |
|            |                                 |            |                        | 2         | 57,575,912  | 38,939,098            | 68                             | SRX481836            |

<sup>a</sup>The *E. coli* isolates were grown to an OD<sub>600</sub> of 0.5 in either LB broth or DMEM with or without added bile salts.

<sup>b</sup>The percentage of reads mapped includes both aenic and interaenic regions.

**Table S4.** Differential expression of LS-BSR gene clusters that were unique to the EPEC7 and the LT+ EPEC genomes

| Cluster ID                                | Gene ID     | Predicted Protein Function                                                         | LFC <sup>2</sup> |               |                |            |             |               |                |            |             |               |                |            |             |               |                |            |
|-------------------------------------------|-------------|------------------------------------------------------------------------------------|------------------|---------------|----------------|------------|-------------|---------------|----------------|------------|-------------|---------------|----------------|------------|-------------|---------------|----------------|------------|
|                                           |             |                                                                                    | H10407           |               |                |            | 402290      |               |                |            | 102651      |               |                |            | 102712      |               |                |            |
|                                           |             |                                                                                    | DMEM vs. LB      | DMEMB vs. LBB | DMEMB vs. DMEM | LBB vs. LB | DMEM vs. LB | DMEMB vs. LBB | DMEMB vs. DMEM | LBB vs. LB | DMEM vs. LB | DMEMB vs. LBB | DMEMB vs. DMEM | LBB vs. LB | DMEM vs. LB | DMEMB vs. LBB | DMEMB vs. DMEM | LBB vs. LB |
| <b>Gene Clusters of ETEC and LT+ EPEC</b> |             |                                                                                    |                  |               |                |            |             |               |                |            |             |               |                |            |             |               |                |            |
| Cluster_166                               |             | putative monosaccharide-transporting ATPase                                        | -2.48            | NS            | NS             | NS         | NA          | NS            | NS             | NS         | NS          | NS            | NS             | NS         | -2.08       | NS            | NS             | NS         |
| Cluster_167                               | <i>rbsK</i> | ribokinase                                                                         | -3.08            | -2.52         | NS             | NS         | NA          | -3.08         | NS             | NS         | NS          | NS            | NS             | -2.77      | -4.24       | NS            | NS             | NS         |
| Cluster_1384                              |             | pyocin activator PrtN family protein                                               | NS               | NS            | NS             | NS         | NA          | NS            | NS             | NS         | NS          | NS            | NS             | NS         | -4.52       | NS            | NS             | NS         |
| Cluster_2548                              | <i>fucP</i> | H+ symporter permease                                                              | -2.95            | NS            | NS             | NS         | NA          | -2.23         | NS             | NS         | NS          | NS            | NS             | NS         | -2.06       | NS            | NS             | NS         |
| Cluster_3285                              | <i>eltB</i> | heat-labile enterotoxin beta chain family protein                                  | NS               | -3.24         | -2.17          | NS         | NA          | -3.97         | NS             | NS         | NS          | NS            | NS             | NS         | -4.27       | -2.31         | NS             | NS         |
| Cluster_3286                              | <i>eltA</i> | heat-labile enterotoxin alpha chain family protein                                 | -2.19            | -2.54         | NS             | NS         | NA          | -3.32         | NS             | NS         | NS          | NS            | NS             | NS         | -4.26       | NS            | NS             | NS         |
| <b>Gene Clusters of EPEC7</b>             |             |                                                                                    |                  |               |                |            |             |               |                |            |             |               |                |            |             |               |                |            |
| Cluster_2234                              |             | binding-protein-dependent transport system inner membrane component family protein | NA               | NA            | NA             | NA         | NS          | -2.62         | NS             | NS         | NS          | NS            | NS             | NS         | -4.75       | NS            | NS             | NS         |
| Cluster_2596                              |             | hypothetical protein                                                               | NA               | NA            | NA             | NA         | NS          | NS            | NS             | NS         | NS          | NS            | NS             | NS         | -4.32       | NS            | NS             | NS         |
| Cluster_2876                              |             | helix-turn-helix domain protein                                                    | NA               | NA            | NA             | NA         | NS          | NS            | NS             | NS         | NS          | NS            | NS             | NS         | -2.32       | NS            | NS             | NS         |
| Cluster_3059                              | <i>bor</i>  | lipoprotein Bor                                                                    | NA               | NA            | NA             | NA         | -3.81       | -2.99         | NS             | 2.35       | NS          | -3.20         | -2.49          | NS         | NS          | NS            | NS             | NS         |
| Cluster_4588                              |             | polysaccharide deacetylase family protein                                          | NA               | NA            | NA             | NA         | -3.17       | -3.17         | -2.62          | 2.15       | NS          | -3.88         | -2.43          | 2.36       | NS          | NS            | NS             | NS         |
| Cluster_4588                              |             | polysaccharide deacetylase family protein                                          | NA               | NA            | NA             | NA         | NS          | -3.17         | -2.62          | 2.15       | NS          | -3.88         | -2.43          | 2.36       | NS          | NS            | NS             | NS         |
| Cluster_4702                              |             | alpha amylase, N-terminal ig-like domain protein                                   | NA               | NA            | NA             | NA         | NS          | NS            | NS             | NS         | NS          | NS            | -2.65          | NS         | NS          | NS            | NS             | NS         |
| Cluster_4704                              |             | bacterial extracellular solute-binding family protein                              | NA               | NA            | NA             | NA         | NS          | -2.38         | NS             | NS         | NS          | NS            | -4.22          | NS         | NS          | NS            | NS             | NS         |
| Cluster_4705                              |             | putative CymA protein                                                              | NA               | NA            | NA             | NA         | NS          | -3.35         | NS             | NS         | NS          | NS            | NS             | NS         | NS          | NS            | NS             | NS         |
| Cluster_5167                              |             | conserved hypothetical protein                                                     | NA               | NA            | NA             | NA         | NS          | NS            | NS             | NS         | NS          | NS            | -5.61          | -4.37      | NS          | NS            | NS             | NS         |
| Cluster_593                               |             | conserved hypothetical protein                                                     | NA               | NA            | NA             | NA         | -3.64       | -3.61         | -2.35          | 2.35       | NS          | -4.41         | -3.19          | NS         | NS          | NS            | NS             | NS         |
| Cluster_596                               |             | glycosyl transferases group 1 family protein                                       | NA               | NA            | NA             | NA         | -3.19       | -3.22         | NS             | 2.09       | NS          | -4.24         | -2.64          | NS         | NS          | NS            | NS             | NS         |
| Cluster_901                               |             | repair family protein                                                              | NA               | NA            | NA             | NA         | NS          | NS            | NS             | NS         | NS          | NS            | -2.98          | -2.77      | NS          | NS            | NS             | NS         |
| <b>Gene Clusters of LT+ EPEC</b>          |             |                                                                                    |                  |               |                |            |             |               |                |            |             |               |                |            |             |               |                |            |
| Cluster_1479                              |             | PLD-like domain protein                                                            | NA               | NA            | NA             | NA         | NA          | -4.63         | -3.13          | NS         | NS          | -3.93         | -4.18          | NS         | NS          | NS            | NS             | NS         |
| Cluster_1806                              |             | putative membrane protein                                                          | NA               | NA            | NA             | NA         | NA          | -2.43         | NS             | NS         | NS          | NS            | -3.67          | NS         | NS          | NS            | NS             | NS         |
| Cluster_1927                              | <i>papA</i> | Pap fimbrial major pilin protein                                                   | NA               | NA            | NA             | NA         | NA          | NS            | NS             | 4.50       | 5.42        | NS            | -2.21          | 4.22       | 5.75        | NS            | NS             | NS         |
| Cluster_1931                              |             | helix-turn-helix domain protein                                                    | NA               | NA            | NA             | NA         | NA          | NS            | NS             | 3.20       | 5.33        | NS            | -3.30          | 2.65       | 5.61        | NS            | NS             | NS         |
| Cluster_1934                              |             | PapG chaperone-binding domain protein                                              | NA               | NA            | NA             | NA         | NA          | NS            | NS             | 2.34       | 3.19        | NS            | NS             | 2.21       | 4.02        | NS            | NS             | NS         |
| Cluster_26                                |             | aspartate racemase family protein                                                  | NA               | NA            | NA             | NA         | NA          | NS            | NS             | NS         | NS          | NS            | NS             | 3.88       | NS          | NS            | NS             | NS         |
| Cluster_3228                              | <i>isoB</i> | antitoxin LsoB                                                                     | NA               | NA            | NA             | NA         | NA          | NS            | NS             | NS         | NS          | NS            | -2.03          | NS         | NS          | NS            | NS             | NS         |
| Cluster_329                               | <i>papH</i> | PAP fimbrial minor pilin protein                                                   | NA               | NA            | NA             | NA         | NA          | NS            | NS             | 3.46       | NS          | NS            | -2.58          | NS         | NS          | NS            | NS             | 3.08       |
| Cluster_3432                              |             | conserved hypothetical protein                                                     | NA               | NA            | NA             | NA         | NA          | -3.23         | NS             | NS         | NS          | NS            | NS             | NS         | NS          | NS            | NS             | NS         |
| Cluster_3459                              |             | TIR domain protein                                                                 | NA               | NA            | NA             | NA         | NA          | -2.40         | NS             | NS         | NS          | NS            | -2.66          | -3.05      | NS          | NS            | NS             | NS         |
| Cluster_81                                |             | aminotransferase class I and II family protein                                     | NA               | NA            | NA             | NA         | NA          | -2.01         | NS             | NS         | NS          | NS            | NS             | NS         | NS          | NS            | NS             | NS         |

<sup>2</sup>LFC is the log<sub>2</sub> fold-change

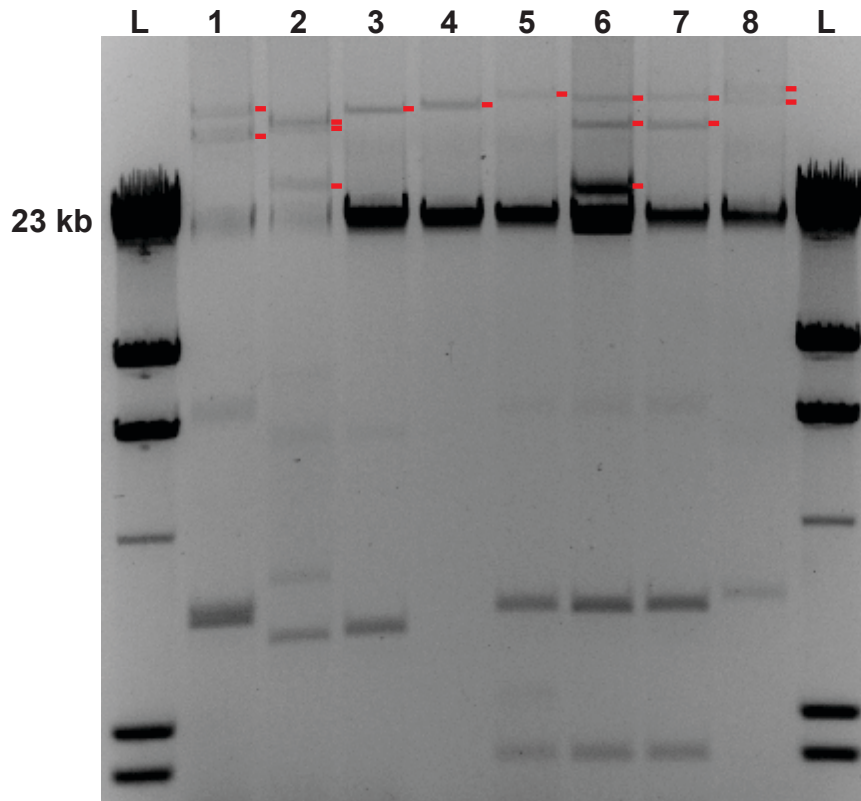

**Figure S1. Plasmid profiles of the EPEC/ETEC isolates.** Agarose gel electrophoresis of plasmids in ETEC isolates H10407 (1) and E24377A (2), tEPEC isolates E2348/69 (3) and 402290 (4), and EPEC/ETEC hybrid isolates 102651 (5), 102712 (6), 102771 (7), and 401140 (8) with the lambda DNA Hind-III digested ladder (NEB) (L). Each of the large plasmid bands (>23 kb) is indicated by a red line. The top band of the lambda DNA ladder is approximately 23 kb and corresponds with the sheared linearized chromosomal DNA present in each of the plasmid extractions.

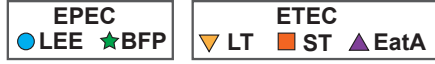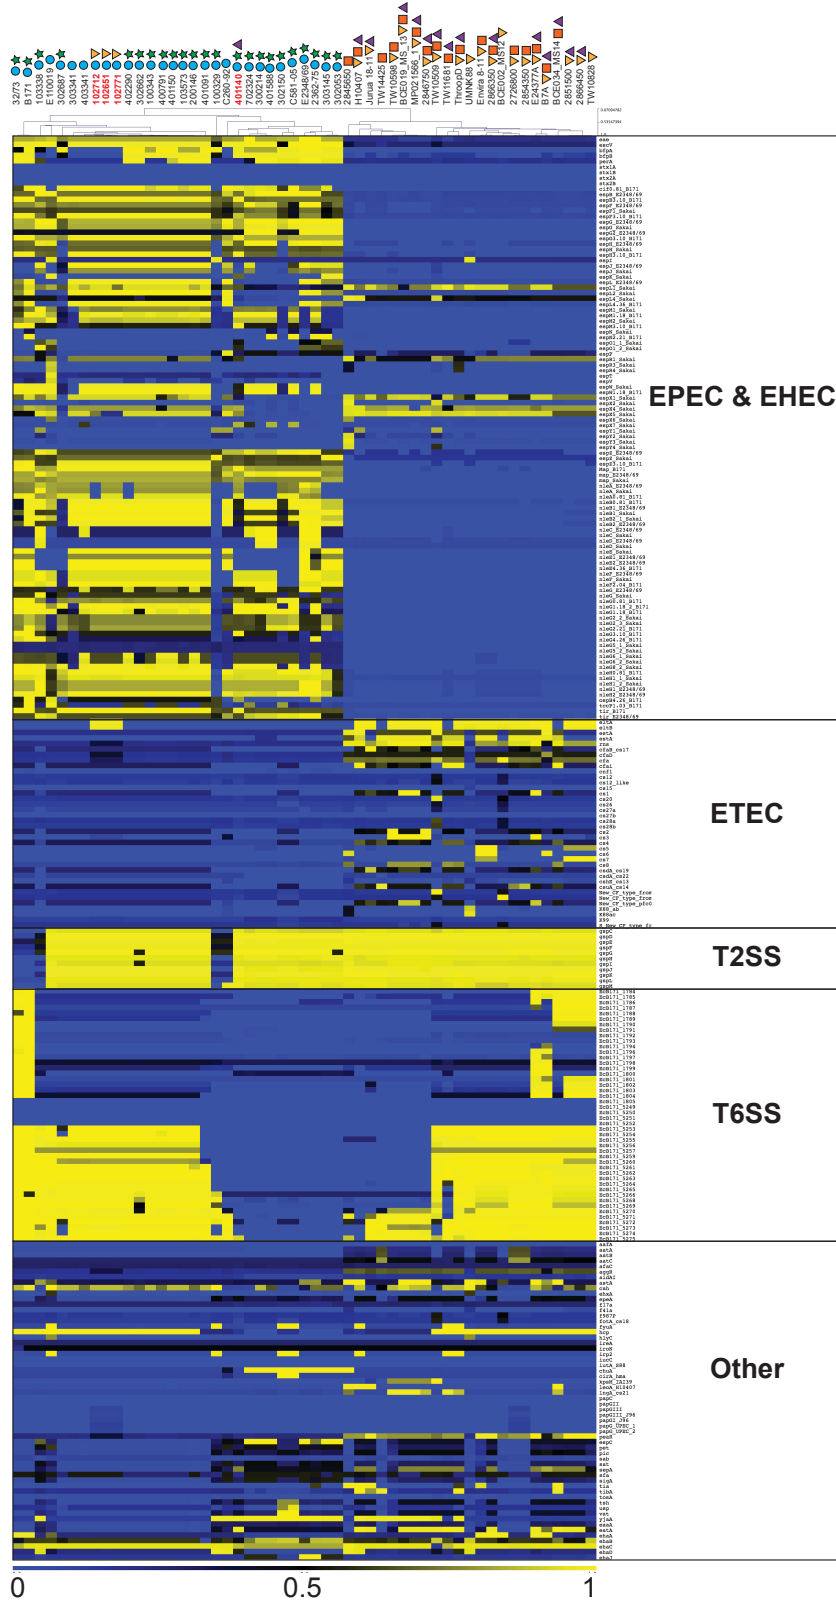

**Figure S2. *In silico* detection of *E. coli* virulence genes.** The protein-encoding regions of previously described *E. coli* virulence genes were identified in each of the EPEC and ETEC genomes using TBLASTN LS-BSR <sup>1,2</sup> and visualized using MEV<sup>3</sup>. Each row represents a virulence gene and each column is a different genome. The genomes were grouped by hierarchical cluster analysis of their LS-BSR values, with yellow indicating the presence and blue indicating the absence of each virulence gene in the genomes. The EPEC/ETEC hybrid isolates are indicated in bold red.

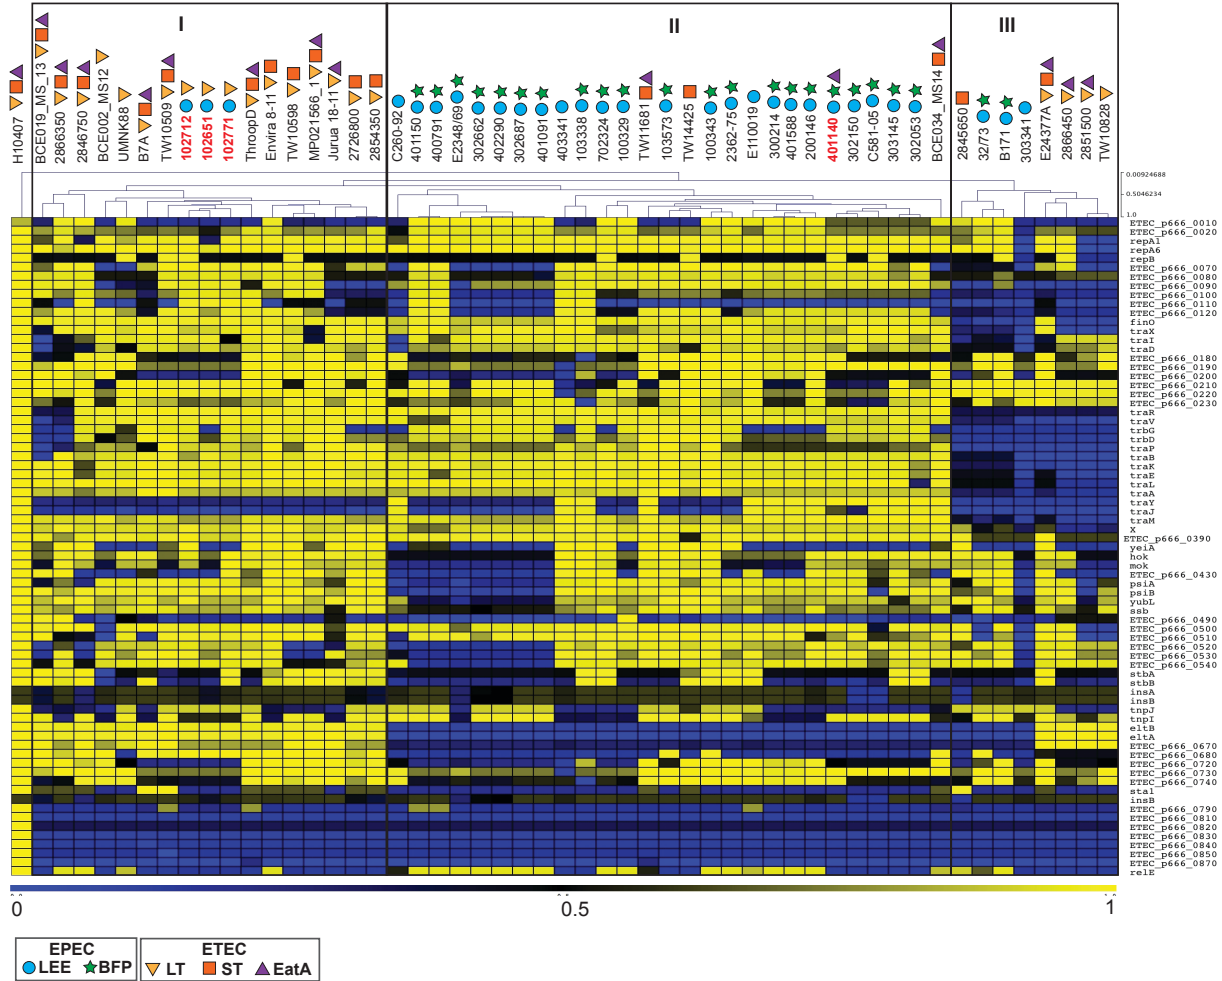

**Figure S3. *In silico* detection of an LT-encoding plasmid, p666.** The protein-encoding genes of plasmid p666 from ETEC isolate H10407<sup>4</sup> were identified in each of the EPEC and ETEC genomes using TBLASTN LS-BSR<sup>1,2</sup>. Each row represents a plasmid gene and each column is a different genome. The genomes were grouped by hierarchical cluster analysis of their LS-BSR values using MEV<sup>3</sup>. Yellow indicates the presence and blue indicates the absence of each plasmid gene in the genomes. The EPEC/ETEC isolates are indicated in bold red.



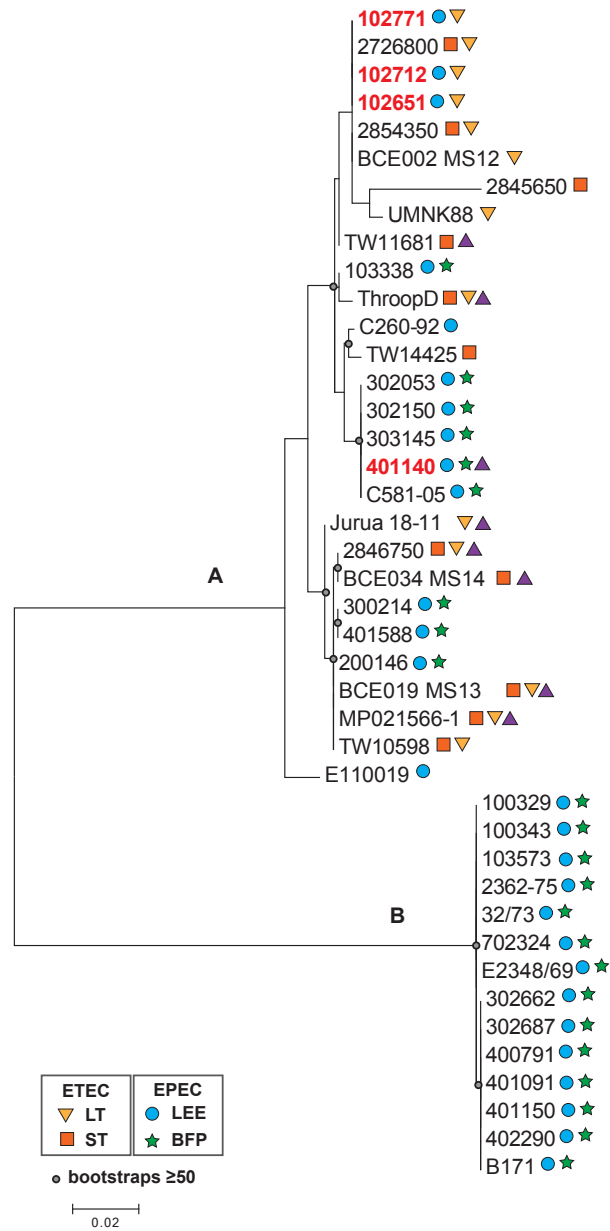

**Figure S5. FIB *repA* phylogeny.** A maximum-likelihood phylogeny comparing the nucleotide sequences of the putative FIB-type *repA* genes identified in the EPEC and ETEC genomes analyzed in this study including the EPEC/ETEC hybrid isolates. The maximum-likelihood phylogeny was generated using the Kimura 2-parameter model and 1,000 bootstrap values with MEGA6<sup>5</sup>. Virulence genes present in each of the genome sequences are indicated by symbols as follows: LT (yellow triangle), ST (orange



square), LEE (blue circle), BFP (green star), and EatA (purple triangle). The EPEC/ETEC isolates are indicated in bold red and all fall into group A. The scale bar indicates the distance of 0.02 nucleotide substitutions per site. The grey circles on the nodes of the tree indicate a bootstrap value of  $\geq 50$ .

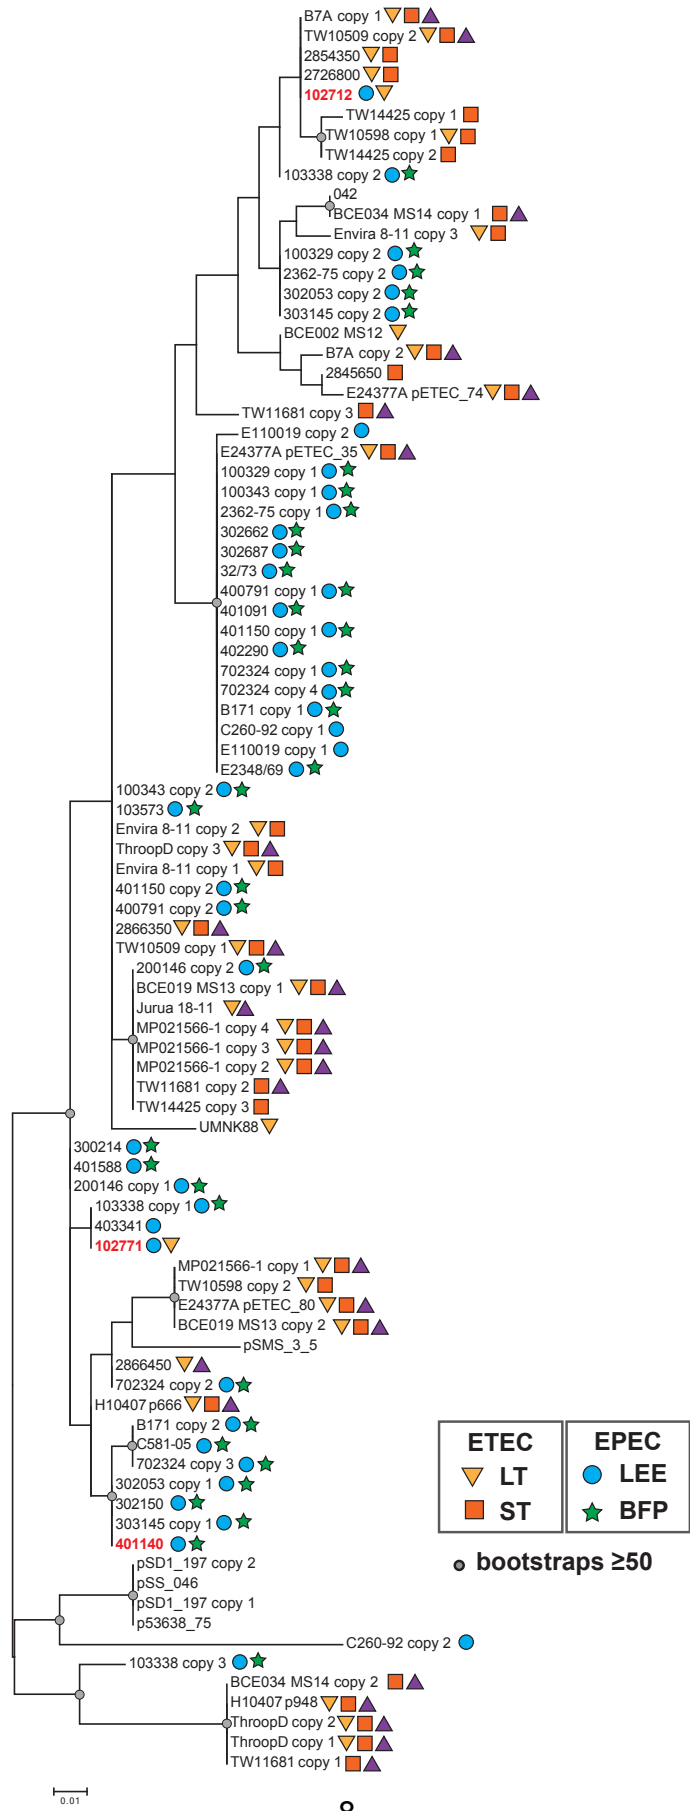

**Figure S6. FIIA *repA* phylogeny.** A maximum-likelihood phylogeny comparing the nucleotide sequences of the putative FIIA-type *repA* genes identified in the EPEC and ETEC genomes analyzed in this study including the EPEC/ETEC hybrid isolates. The maximum-likelihood phylogeny was generated using the Kimura 2-parameter model and 1,000 bootstrap values with MEGA6 <sup>5</sup>. Virulence genes present in each of the genome sequences are indicated by symbols as follows: LT (yellow triangle), ST (orange square), LEE (blue circle), BFP (green star), and EatA (purple triangle). The EPEC/ETEC hybrid isolates are indicated in bold red. The scale bar indicates the distance of 0.01 nucleotide substitutions per site. The grey circles on the nodes of the tree indicate a bootstrap value of  $\geq 50\%$ .



B.

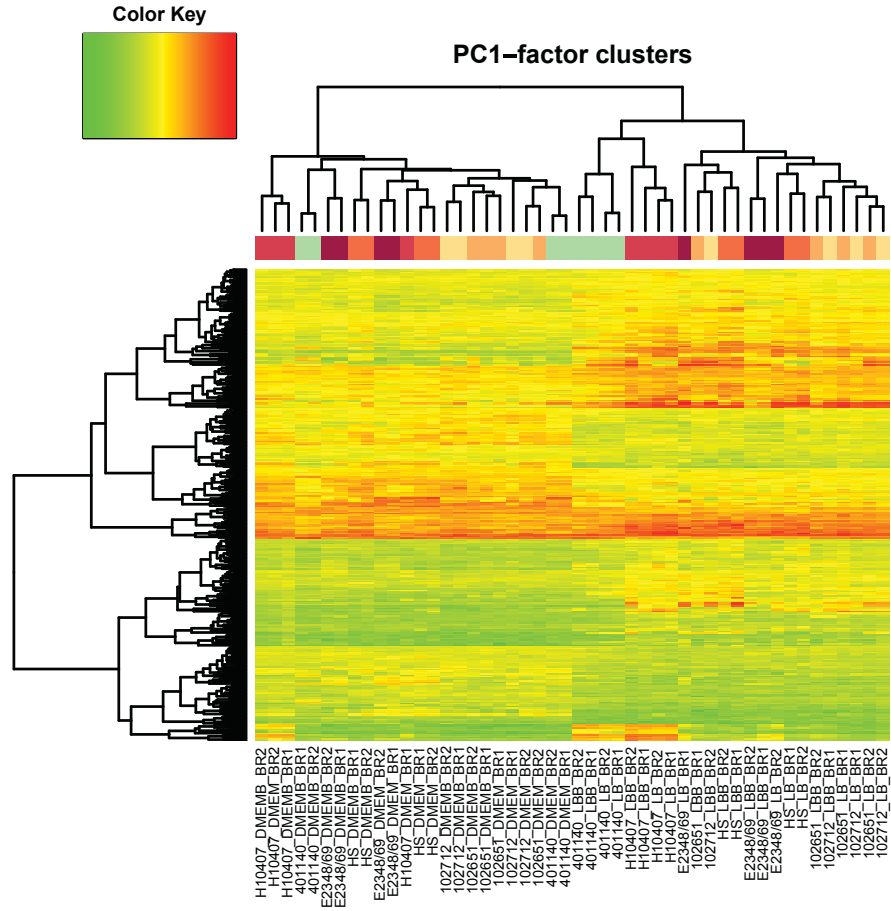

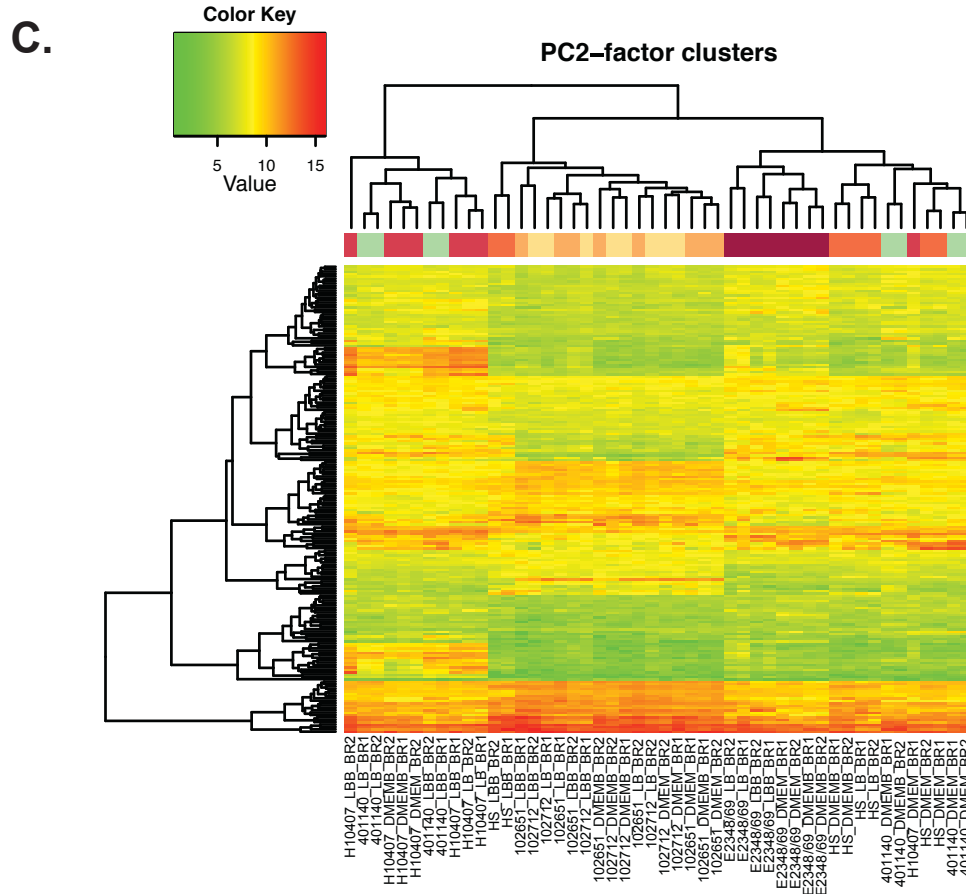

**Figure S7. Analysis of the RNA-Seq samples with and without bile. A)** Principal component analysis of the normalized expression values of the RNA-Seq samples with (LBB and DMEMB) and without (LB and DMEM) bile for ETEC isolate H10407, non-pathogenic isolate HS, EPEC isolate E2348/69, and the EPEC/ETEC isolates 102651, 102712, and 401140. Each of the RNA-Seq samples is indicated by a symbol as follows: LB (triangle), LBB (diamond), DMEM (square), and DMEMB (circle). Each of the *E. coli* isolates is identified by a different color. The red line separates the LB and DMEM samples. Biological replicates cluster together in this analysis. **B)** Hierarchical clustering of 333 gene clusters of PC1 and **C)** 196 gene clusters of PC2. The heatmap displays the normalized gene expression values of the LS-BSR gene clusters that were present in all of the genomes and had the greatest deviation in their expression values.



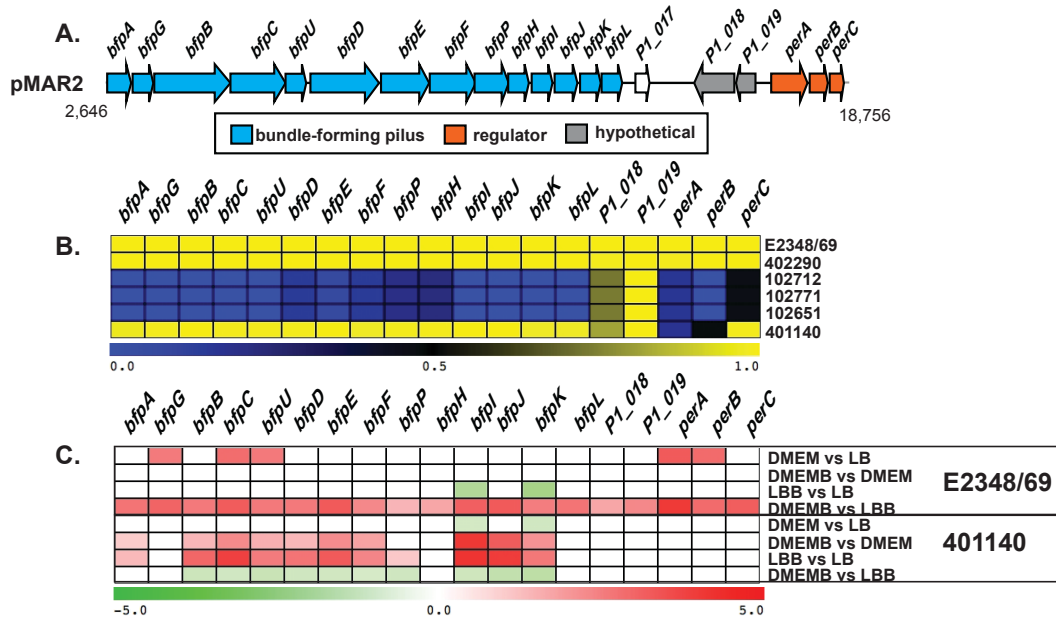

**Figure S8. Differential expression of protein-encoding genes within the BFP region.** **A)** Diagram of the protein-encoding genes within the BFP region of the sequenced EPEC plasmid, pMAR2, of EPEC isolate E2348/69. The predicted protein function is indicated by the color of the arrow, and the size and direction of the arrows indicates the size of each predicted gene and the direction of transcription. **B)** *In silico* detection of the protein-encoding genes of the BFP region of pMAR2 in each of the EPEC genomes analyzed in this study. The colors of the heatmap represent the BSR values of each gene, with yellow indicating a gene is present and blue indicating a gene is absent. **C)** Heatmap of the differential expression for each of the sample comparisons of EPEC isolates E2348/69 and 401140, which contain the BFP region. Only significant  $\log_2$  fold-change (LFC) values  $\geq 1$  or  $\leq -1$  are included in the heatmap. Red indicates increased differential expression while green indicates decreased



differential expression. White indicates that a gene was either not present in the EPEC isolate, and/or did not exhibit significant differential expression.

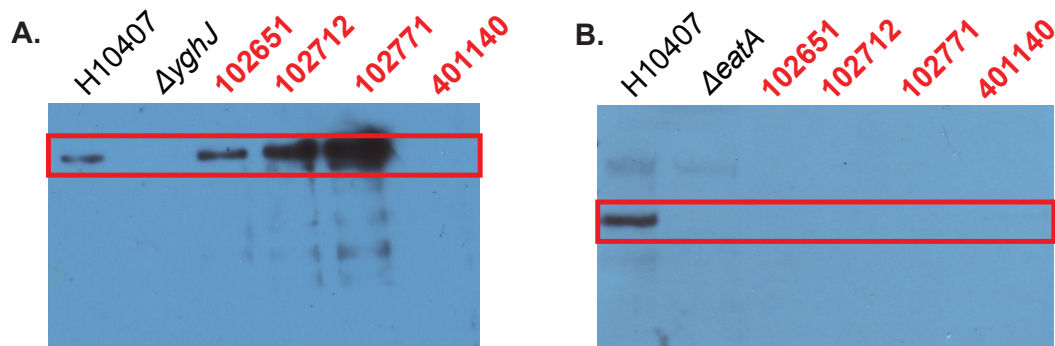

**Figure S9. Immunoblot analysis of secreted proteins for YghJ and EatA. A)**

Detection of YghJ, a metalloprotease secreted by the T2SS, and **B)** the autotransporter protein EatA by immunoblot as previously described in Luo *et al.*<sup>6</sup> and Patel *et al.*<sup>7</sup>, respectively. The EPEC/ETEC hybrid isolates are indicated in bold red and a red box is drawn around the expected location of the protein band relative to the positive control strain H10407. All EPEC/ETEC hybrids, with the exception of 401140 secreted YghJ, whereas none of the hybrid isolates secreted EatA.

A.

```
H10407 ATGAAAAATATAACTTTTCATTTTTTTTTATTTTATTAGCATCGCCATTATATGCAAATGGCGACAAATTATACCGTGCT
102651 . . . . .
102771 . . . . .
102712 . . . . .

H10407 GACTCTAGACCCCCAGATGAAATAAAACGTTCCGGAGGTCTTATGCCAGAGGGCATAATGAGTACTTCGATAGAGGA
102651 . . . . .
102771 . . . . .
102712 . . . . .

H10407 ACTCAAATGAATATTAATCTTTATGATCACGCGAGAGGAACACAAACCGGCTTTGTCAGATATGATGACGGATATGTT
102651 . . . . .
102771 . . . . .
102712 . . . . .

H10407 TCCACTTCTCTTAGTTTGAGAAGTGCTCACTTAGCAGGACAGTCTATATTATCAGGATATTCCACTTACTATATATAT
102651 . . . . .
102771 . . . . .
102712 . . . . .

H10407 GTTATAGCGACAGCACCAAATATGTTTAATGTTAATGATGTATTAGGCGTATACAGCCCTCACCCATATGAACAGGAG
102651 . . . . .
102771 . . . . .
102712 . . . . .

H10407 GTTCTCGCTTAGGTGGAATACCATATCTCAGATATATGGATGGTATCGTGTTAATTTGGTGTGATTGATGAACGA
102651 . . . . .
102771 . . . . .
102712 . . . . .

H10407 TTACATCGTAACAGGGAATATAGAGACCGGTATTACAGAAATCTGAATATAGCTCCGGCAGAGGATGGTTACAGATTA
102651 . . . . .
102771 . . . . .
102712 . . . . .

H10407 GCAGGTTTCCACCGGATCACCTCAGCTTGGAGAGAAGAACCCTGGATTTCATCATGCACCACAAGGTTGTGGAAATTC
102651 . . . . .
102771 . . . . .
102712 . . . . .

H10407 TCAAGAACAATTACAGGTGATACTTGTAAATGAGGAGACCCAGAATCTGAGCACAATATATCTCAGGAAATATCAATCA
102651 . . . . .
102771 . . . . .
102712 . . . . .

H10407 AAAGTTAAGAGGCAGATATTTTCAGACTATCAGTCAGAGGTTGACATATATAACAGAATTCGGAATGAATTATGA
102651 . . . . .
102771 . . . . .
102712 . . . . .
```

B.

```
H10407 MKNITFIFFILLASPLYANGDKLYRADSRPPDEIKRSGGLMPRGHNEYFDRGTQMNINLYDHARGTQTGFVRYDDGYVST
102651 . . . . .
102771 . . . . .
102712 . . . . .

H10407 SLSLRS AHL LAGQSILSGYSTYYIYVIATAPNMFNVNDVLGVYSPHPYEQEVSALGGIPYSQIYGWYRVNFGVIDERLHRN
102651 . . . . .
102771 . . . . .
102712 . . . . .

H10407 REYRDYRNLNIAPAEDGYRLAGFPPDHO
102651 . . . . .
102771 . . . . .
102712 . . . . .
```

**Figure S10. Alignment of *eltA*.** The predicted *EltA*-encoding region of the EPEC/ETEC hybrids 102651, 102712, and 102771 were aligned to the *eltA* gene of the ETEC reference strain H10407. The nucleotide sequences are aligned in panel A, while the predicted amino acid sequences are aligned in panel B. The alignments were generated using ClustalW of MEGA6<sup>8</sup>. Similarities are indicated with a dot while nucleotide or amino acid differences are shown and highlighted in yellow. A box is drawn around the nucleotide change that resulted in the introduction of a stop codon and truncation of the coding region in the predicted *eltA* gene of the EPEC/ETEC hybrids.

## References

- 1 Sahl, J. W., Caporaso, J. G., Rasko, D. A. & Keim, P. The large-scale blast score ratio (LS-BSR) pipeline: a method to rapidly compare genetic content between bacterial genomes. *PeerJ* **2**, e332, doi:10.7717/peerj.332 (2014).
- 2 Hazen, T. H. *et al.* Refining the pathovar paradigm via phylogenomics of the attaching and effacing *Escherichia coli*. *Proc Natl Acad Sci USA* **110**, 12810-12815, doi:10.1073/pnas.1306836110 (2013).
- 3 Saeed, A. I. *et al.* TM4 microarray software suite. *Methods Enzymol* **411**, 134-193, doi:10.1016/S0076-6879(06)11009-5 (2006).
- 4 Crossman, L. C. *et al.* A commensal gone bad: complete genome sequence of the prototypical enterotoxigenic *Escherichia coli* strain H10407. *J Bacteriol* **192**, 5822-5831, doi:10.1128/JB.00710-10 (2010).
- 5 Tamura, K., Stecher, G., Peterson, D., Filipowski, A. & Kumar, S. MEGA6: Molecular Evolutionary Genetics Analysis version 6.0. *Mol Biol Evol* **30**, 2725-2729, doi:10.1093/molbev/mst197 (2013).
- 6 Luo, Q. *et al.* Enterotoxigenic *Escherichia coli* secretes a highly conserved mucin-degrading metalloprotease to effectively engage intestinal epithelial cells. *Infect Immun* **82**, 509-521, doi:10.1128/IAI.01106-13 (2014).
- 7 Patel, S. K., Dotson, J., Allen, K. P. & Fleckenstein, J. M. Identification and molecular characterization of EatA, an autotransporter protein of enterotoxigenic *Escherichia coli*. *Infect Immun* **72**, 1786-1794 (2004).
- 8 Kumar, S., Stecher, G. & Tamura, K. MEGA7: Molecular Evolutionary Genetics Analysis Version 7.0 for Bigger Datasets. *Mol Biol Evol* **33**, 1870-1874, doi:10.1093/molbev/msw054 (2016).
